# Supplementary material for: Bimetallic FeNi-MIL-88-derived NiFe2O4@Ni–Mn LDH composite electrode material for a high performance asymmetric supercapacitor
Source: Royal Society of Chemistry journal article supplement (doi:10.1039/d0dt00251h), 2020-01-01
Supplement: d0dt00251h1.pdf [file d0dt00251h1.pdf]

## Supplementary Material for

### **Bimetallic FeNi-MIL-88-derived NiFe<sub>2</sub>O<sub>4</sub>@NiMn-LDH composite electrode material for high performance asymmetric supercapacitor**

Shaobin Li<sup>a,\*</sup>, Jing Pan<sup>a</sup>, Fengbo Li<sup>c</sup>, Li Zhang<sup>a</sup>, Dongfeng Chai<sup>b</sup>, Zhuangfang Zhang<sup>b,\*</sup>,  
and Jianjiao Xin<sup>b</sup>

*<sup>a</sup>College of Materials Science and Engineering, Qiqihar University, Qiqihar 161006,  
China.*

*<sup>b</sup>Center of Teaching Experiment Management Equipment, Qiqihar University, Qiqihar  
161006, Heilongjiang, China.*

*<sup>c</sup>College of Chemical and Environmental Engineering, Harbin University of Science  
and Technology, Harbin 150040, China.*

\*Corresponding authors.

E-mail: qqhrslsb1022@126.cm (S. Li), zzfhao2014@163.com (Z. Zhang).

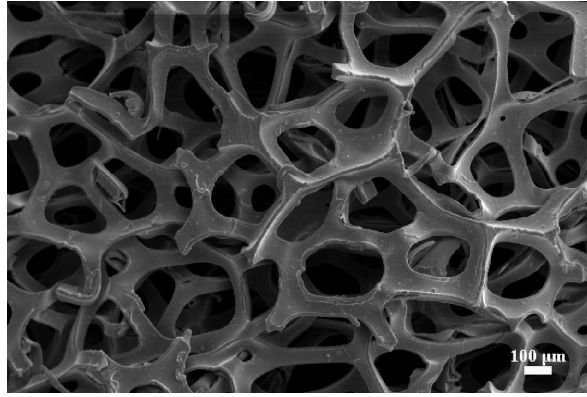

**Fig. S1.** SEM image of bare Ni foam.

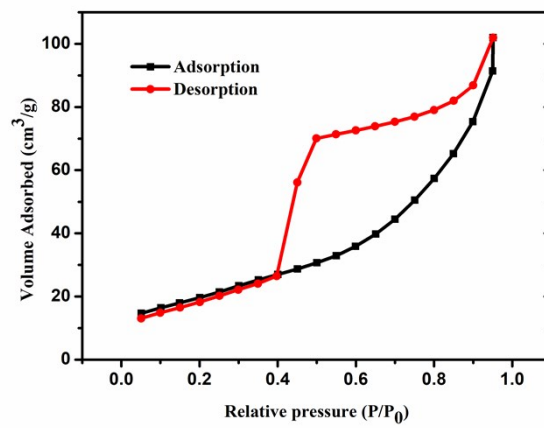

**Fig. S2** N<sub>2</sub> adsorption-desorption isotherms of the for NiFe<sub>2</sub>O<sub>4</sub>@Ni-Mn LDH/NF the calculation of specific surface area with the BET method.

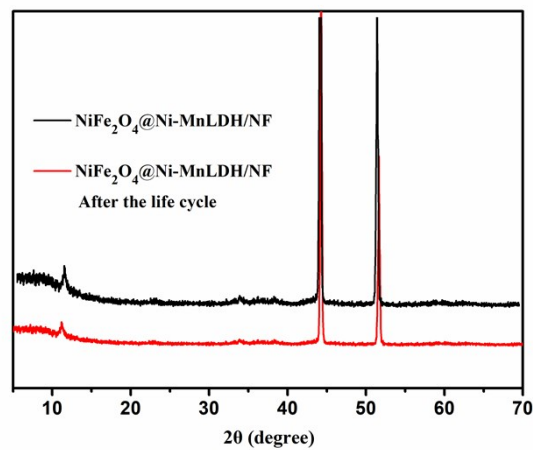

**Fig. S3.** XRD images of NiFe<sub>2</sub>O<sub>4</sub>@Ni-Mn LDH/NF after the life cycle.

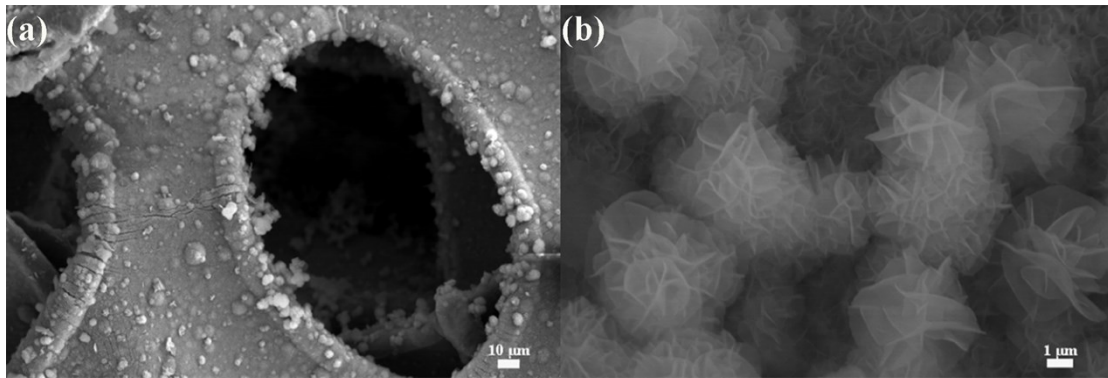

**Fig. S4.** SEM images of NiFe<sub>2</sub>O<sub>4</sub>@Ni-Mn LDH/NF after the life cycle.

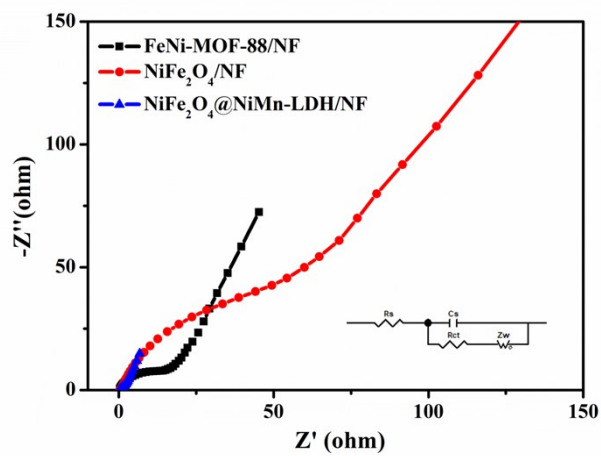

**Fig. S5.** EIS curves of different materials, and equivalent circuit of impedance data.

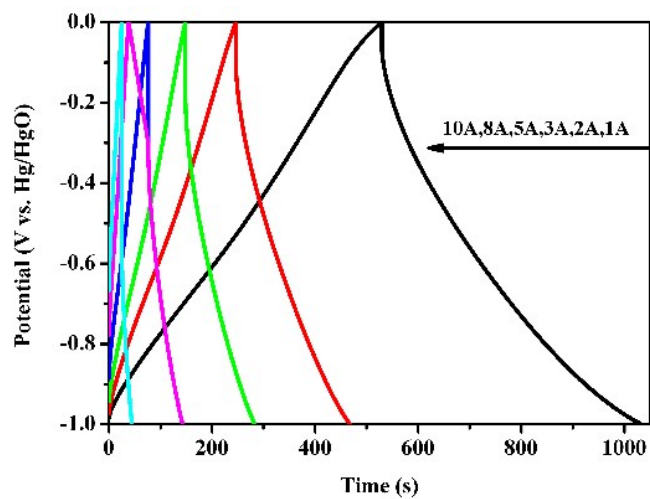

**Fig. S6.** GCD curves of AC at different current densities 1-10 A g<sup>-1</sup>.

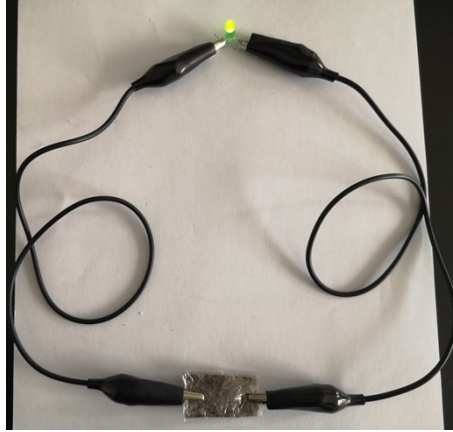

**Fig. S7.** Demonstration of a green LED powered up by NiFe<sub>2</sub>O<sub>4</sub>@Ni-Mn LDH/NF//AC ASC.

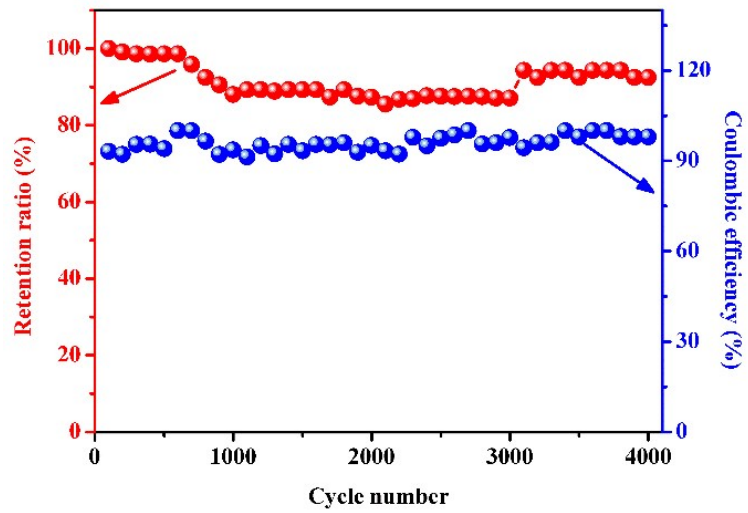

**Fig. S8.** Cycling performances for NiFe<sub>2</sub>O<sub>4</sub>@Ni-Mn LDH/NF//AC over 4000 cycles.
